# Supplementary material for: The Impacts of the Sterilization Method and the Electrospinning Conditions of Nanofibrous Biodegradable Layers on Their Degradation and Hemocompatibility Behavior
Source: MDPI journal article supplement (doi:10.3390/polym16081029), 2024-04-09
Supplement: s1 [file s1]

**S1**

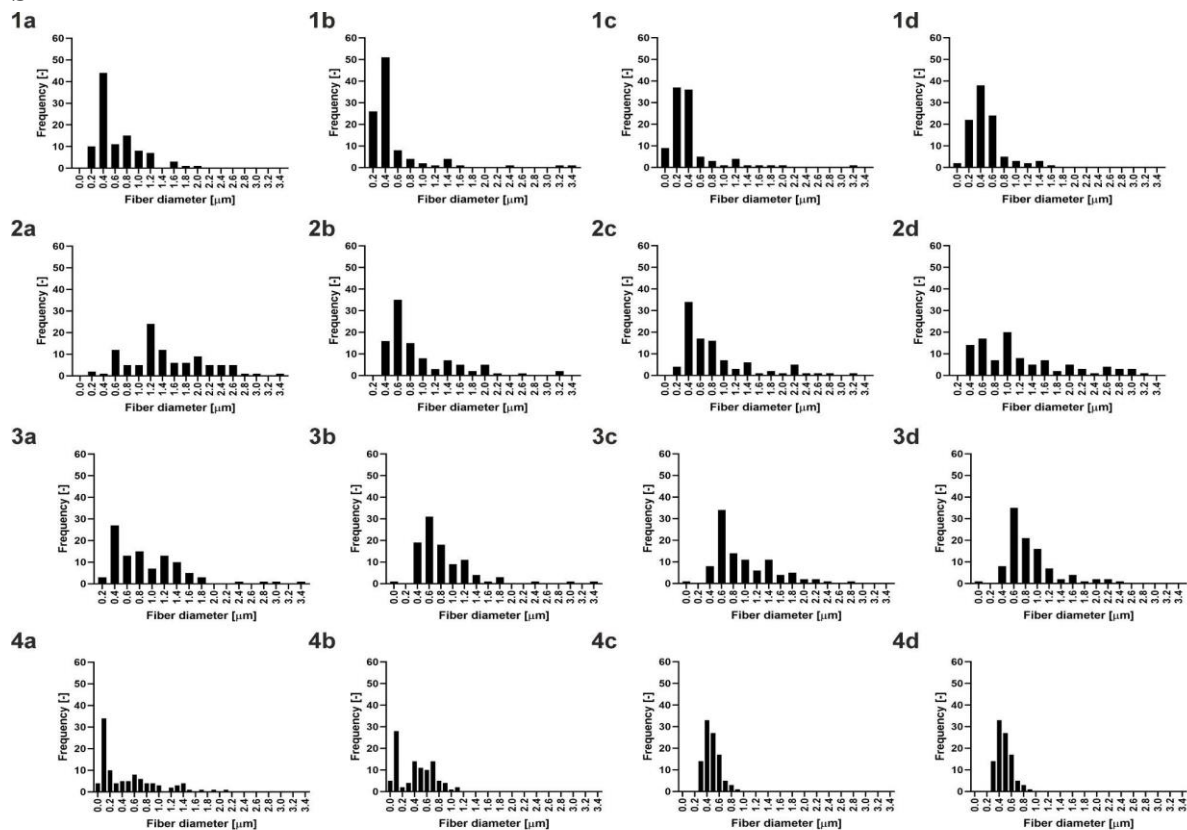

Figure S1: Histograms of the fiber diameter measurements for all the electrospun samples without sterilization (a) and with sterilization using ethylene oxide (b) and gamma irradiation at 15 kGy (c) and 40 kGy (d). Materials: PCL45 (1), PCL80 (2), PLCL82 (3) and PLCL111 (4).

**S2**

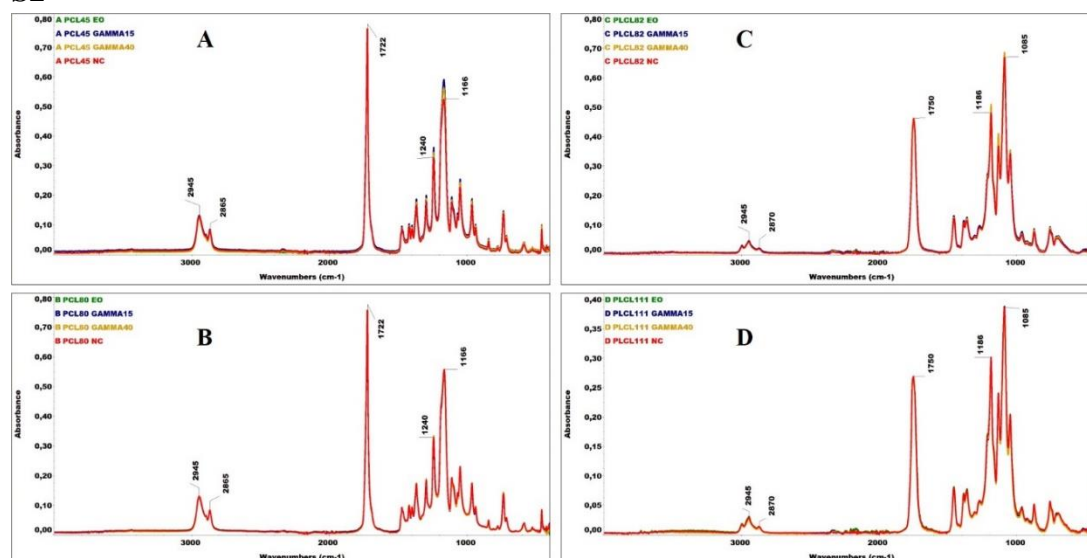

Figure S2: Infrared spectroscopy (FTIR spectra) graphs of the tested nanofiber materials compiled so as to verify the possible formation of new bonds due to sterilization. FTIR analysis was performed for PCL45 (A), PCL80 (B), PLCL82 (C) and PLCL111 (D). The spectra are presented for the non-sterilized materials (NC) and the materials subjected to ethylene oxide (EO) and gamma irradiation at doses of 15 kGy and 40 kGy (GAMMA 15 and GAMMA 40)

## Materials and Methods

### *Viscosity of Polymer Solutions*

The viscosity of polymer solutions was measured on the IKA Rotavisc lo-vi Complete (IKA, Germany). The SP-2 spindle (diameter 18.7 mm, immersion depth 50 mm) was used for the measurements. The volume of the solution was 50 ml. The temperature of the solution was  $20.75 \pm 0.5$  °C. Rpm determined with respect to torque (M=50%). Triplicate measurements for each solution were made.

Table S3: Viscosity of polymer solutions for electrospinning determined on a rotating viscometer.

| Polymer Solution | Concentration [wt %] | Torque M [%] | rpm | Viscosity [mPa·s] |
|------------------|----------------------|--------------|-----|-------------------|
| PCL 45           | 16                   | 50.6         | 82  | $185.67 \pm 0.61$ |
| PCL 80           | 10                   | 50.6         | 17  | $892.00 \pm 0.85$ |
| PLCL_82          | 10                   | 51.0         | 35  | $526.57 \pm 0.9$  |
| PLCL_111         | 10                   | 51.2         | 103 | $105.00 \pm 0.6$  |
